# Supplementary material for: Total synthesis of marinomycin A using salicylate as a molecular switch to mediate dimerization
Source: Springer Nature journal article supplement (doi:10.1038/nchem.1330), 2012-06-29
Supplement: 41557_2012_BFnchem1330_MOESM15_ESM.mol [file 41557_2012_BFnchem1330_MOESM15_ESM.mol]

  ChemDraw04241212152D

 13 13  0  0  0  0  0  0  0  0999 V2000
    0.3572   -0.8250    0.0000 C   0  0  0  0  0  0  0  0  0  0  0  0
   -0.3572   -1.2375    0.0000 C   0  0  0  0  0  0  0  0  0  0  0  0
   -1.0717   -0.8250    0.0000 C   0  0  0  0  0  0  0  0  0  0  0  0
    0.3572    0.0000    0.0000 O   0  0  0  0  0  0  0  0  0  0  0  0
   -1.0717    0.0000    0.0000 O   0  0  0  0  0  0  0  0  0  0  0  0
   -1.7862   -1.2375    0.0000 C   0  0  0  0  0  0  0  0  0  0  0  0
    1.0717   -1.2375    0.0000 C   0  0  0  0  0  0  0  0  0  0  0  0
    1.7862   -0.8250    0.0000 C   0  0  0  0  0  0  0  0  0  0  0  0
    1.7862    0.0000    0.0000 C   0  0  0  0  0  0  0  0  0  0  0  0
    2.5006   -1.2375    0.0000 O   0  0  0  0  0  0  0  0  0  0  0  0
   -0.3572    0.4125    0.0000 C   0  0  0  0  0  0  0  0  0  0  0  0
   -0.3572    1.2375    0.0000 C   0  0  0  0  0  0  0  0  0  0  0  0
   -2.5006   -0.8250    0.0000 C   0  0  0  0  0  0  0  0  0  0  0  0
  1  2  1  0      
  2  3  1  0      
  1  4  1  1      
  3  5  1  1      
  3  6  1  0      
  1  7  1  0      
  7  8  1  0      
  8  9  1  0      
  8 10  2  0      
  5 11  1  0      
 11  4  1  0      
 11 12  1  1      
  6 13  2  0      
M  END
