# Supplementary material for: Total synthesis of marinomycin A using salicylate as a molecular switch to mediate dimerization
Source: Springer Nature journal article supplement (doi:10.1038/nchem.1330), 2012-06-29
Supplement: 41557_2012_BFnchem1330_MOESM49_ESM.mol [file 41557_2012_BFnchem1330_MOESM49_ESM.mol]

  ChemDraw04241212152D

 55 57  0  0  0  0  0  0  0  0999 V2000
   -7.5315   -0.6872    0.0000 C   0  0  0  0  0  0  0  0  0  0  0  0
   -6.8170   -0.2747    0.0000 C   0  0  0  0  0  0  0  0  0  0  0  0
   -6.1026   -0.6872    0.0000 C   0  0  0  0  0  0  0  0  0  0  0  0
   -5.3881   -0.2747    0.0000 C   0  0  0  0  0  0  0  0  0  0  0  0
   -5.3881    0.5503    0.0000 O   0  0  0  0  0  0  0  0  0  0  0  0
   -4.6736   -0.6872    0.0000 C   0  0  0  0  0  0  0  0  0  0  0  0
   -3.9592   -0.2747    0.0000 C   0  0  0  0  0  0  0  0  0  0  0  0
   -3.2447   -0.6872    0.0000 C   0  0  0  0  0  0  0  0  0  0  0  0
   -7.5315   -1.5122    0.0000 C   0  0  0  0  0  0  0  0  0  0  0  0
   -8.2460   -1.9247    0.0000 O   0  0  0  0  0  0  0  0  0  0  0  0
   -6.8170   -1.9247    0.0000 C   0  0  0  0  0  0  0  0  0  0  0  0
   -6.8170    0.5503    0.0000 O   0  0  0  0  0  0  0  0  0  0  0  0
   -2.5302   -0.2747    0.0000 C   0  0  0  0  0  0  0  0  0  0  0  0
   -2.5302    0.5503    0.0000 O   0  0  0  0  0  0  0  0  0  0  0  0
   -1.8157   -0.6872    0.0000 C   0  0  0  0  0  0  0  0  0  0  0  0
   -1.1013   -0.2747    0.0000 C   0  0  0  0  0  0  0  0  0  0  0  0
   -0.3868   -0.6872    0.0000 C   0  0  0  0  0  0  0  0  0  0  0  0
    0.3277   -0.2747    0.0000 C   0  0  0  0  0  0  0  0  0  0  0  0
    1.0421   -0.6872    0.0000 C   0  0  0  0  0  0  0  0  0  0  0  0
   -1.1013    0.5503    0.0000 O   0  0  0  0  0  0  0  0  0  0  0  0
    0.3277    0.5503    0.0000 C   0  0  0  0  0  0  0  0  0  0  0  0
   -1.8157    0.9628    0.0000 C   0  0  0  0  0  0  0  0  0  0  0  0
   -1.8157    1.7878    0.0000 C   0  0  0  0  0  0  0  0  0  0  0  0
    1.7566   -0.2747    0.0000 C   0  0  0  0  0  0  0  0  0  0  0  0
    2.4711   -0.6872    0.0000 C   0  0  0  0  0  0  0  0  0  0  0  0
    3.1856   -0.2747    0.0000 C   0  0  0  0  0  0  0  0  0  0  0  0
    3.9000   -0.6872    0.0000 C   0  0  0  0  0  0  0  0  0  0  0  0
    4.6145   -0.2747    0.0000 C   0  0  0  0  0  0  0  0  0  0  0  0
    5.3290   -0.6872    0.0000 C   0  0  0  0  0  0  0  0  0  0  0  0
    6.0434   -0.2747    0.0000 C   0  0  0  0  0  0  0  0  0  0  0  0
    6.0434    0.5503    0.0000 C   0  0  0  0  0  0  0  0  0  0  0  0
    6.7579   -0.6872    0.0000 C   0  0  0  0  0  0  0  0  0  0  0  0
    7.4724   -0.2747    0.0000 C   0  0  0  0  0  0  0  0  0  0  0  0
    7.4724    0.5503    0.0000 C   0  0  0  0  0  0  0  0  0  0  0  0
    6.7579    0.9628    0.0000 C   0  0  0  0  0  0  0  0  0  0  0  0
    6.7579   -1.5122    0.0000 C   0  0  0  0  0  0  0  0  0  0  0  0
    7.4724   -1.9247    0.0000 O   0  0  0  0  0  0  0  0  0  0  0  0
    8.1869   -1.5122    0.0000 C   0  0  0  0  0  0  0  0  0  0  0  0
    8.1869   -0.6872    0.0000 O   0  0  0  0  0  0  0  0  0  0  0  0
    6.0434   -1.9247    0.0000 O   0  0  0  0  0  0  0  0  0  0  0  0
    8.5993   -2.2266    0.0000 C   0  0  0  0  0  0  0  0  0  0  0  0
    9.0118   -1.5122    0.0000 C   0  0  0  0  0  0  0  0  0  0  0  0
   -7.5961    1.0006    0.0000 Si  0  0  0  0  0  0  0  0  0  0  0  0
   -7.5961    1.8180    0.0000 C   0  0  0  0  0  0  0  0  0  0  0  0
   -8.3040    0.5919    0.0000 C   0  0  0  0  0  0  0  0  0  0  0  0
   -8.3040    1.4093    0.0000 C   0  0  0  0  0  0  0  0  0  0  0  0
   -9.0118    1.0006    0.0000 C   0  0  0  0  0  0  0  0  0  0  0  0
   -8.3040    2.2266    0.0000 C   0  0  0  0  0  0  0  0  0  0  0  0
   -9.0118    1.8180    0.0000 C   0  0  0  0  0  0  0  0  0  0  0  0
   -8.9571   -1.5141    0.0000 C   0  0  0  0  0  0  0  0  0  0  0  0
   -8.9571   -0.6929    0.0000 O   0  0  0  0  0  0  0  0  0  0  0  0
   -8.2460   -0.2823    0.0000 C   0  0  0  0  0  0  0  0  0  0  0  0
   -6.0993    0.9609    0.0000 C   0  0  0  0  0  0  0  0  0  0  0  0
   -6.0993    1.7783    0.0000 O   0  0  0  0  0  0  0  0  0  0  0  0
   -6.8071    2.1870    0.0000 C   0  0  0  0  0  0  0  0  0  0  0  0
  1  2  1  0      
  2  3  1  0      
  3  4  1  0      
  4  5  1  1      
  4  6  1  0      
  6  7  1  0      
  7  8  2  0      
  1  9  1  0      
  9 10  1  1      
  9 11  1  0      
  2 12  1  6      
  8 13  1  0      
 13 14  1  1      
 13 15  1  0      
 15 16  1  0      
 16 17  1  0      
 17 18  1  0      
 18 19  2  0      
 16 20  1  1      
 18 21  1  0      
 14 22  1  0      
 22 20  1  0      
 22 23  1  1      
 19 24  1  0      
 24 25  2  0      
 25 26  1  0      
 26 27  2  0      
 27 28  1  0      
 28 29  2  0      
 29 30  1  0      
 30 31  2  0      
 30 32  1  0      
 32 33  2  0      
 33 34  1  0      
 34 35  2  0      
 35 31  1  0      
 32 36  1  0      
 36 37  1  0      
 37 38  1  0      
 38 39  1  0      
 39 33  1  0      
 36 40  2  0      
 38 41  1  0      
 38 42  1  0      
 43 44  1  0      
 43 45  1  0      
 43 46  1  0      
 46 47  1  0      
 46 48  1  0      
 46 49  1  0      
 12 43  1  0      
 10 50  1  0      
 50 51  1  0      
 51 52  1  0      
  5 53  1  0      
 53 54  1  0      
 54 55  1  0      
M  END
